# Supplementary material
Source: publisher figshare collection journal article supplement (https://gsapubs.figshare.com/articles/dataset/_/12542561)
Supplement: Supplementary file 1 [file 1]

## Sheet: Table DR1 NVP18
Table DR1. ARGUSVI 40Ar/39Ar laser step-heating analytical results for basalt groundmass sample NVP18 a,b,c
																									Values excluding interference corrections (all other corrections applied)										Background correction
Lab	Step	Laser	Laser	40Ar	±1σ	39Ar	±1σ	38Ar	±1σ	37Ar	±1σ	36Ar	±1σ	39Ar (x10-14 mol)	Ca/K	±1σ	%40Ar*	40Ar*/39ArK	±1σ	Cum.%	Apparent	±1σ	Steps included in age plateau	Steps included in composite isochron and grand weighted mean	40Ar	±1σ	39Ar	±1σ	38Ar	±1σ	37Ar	±1σ	36Ar	±1σ	40Ar	±1σ	39Ar	±1σ	38Ar	±1σ	37Ar	±1σ	36Ar	±1σ
ID	No	Power	Power	(fA)		(fA)b		(fA)		(fA)		(fA)								39ArK	Age (ka)				(fA)		(fA)		(fA)		(fA)		(fA)		(fA)		(fA)		(fA)		(fA)		(fA)
		(%)	(W)
Aliquot: V18-1		99.0 mg
V18-1a	1	4	0.96	508.993	0.0815482	235.152	0.0799981	0.29926	0.000250057	209.667	1.79265	1.58759	0.00132656	0.83479	1.56034	0.0133515	6.87514	0.148855	0.00172034	31.4956	35.2445	0.407323	y	y	509.133	0.0814613	235.289	0.0799981	3.52086	0.059925	209.667	1.79265	1.64156	0.00124337	1.04095	0.033706	0.0236021	0.00977975	-0.37619	0.0530541	0.0209799	0.018962	0.00556267	0.000160063
V18-1b	2	6	1.37	478.39	0.17708	206.127	0.268136	0.282652	0.000319131	201.586	1.9312	1.49948	0.001693	0.731751	1.71145	0.0165461	6.41674	0.148961	0.00260554	59.1037	35.2696	0.616908	y	y	478.512	0.17705	206.258	0.268136	2.82238	0.0322598	201.586	1.9312	1.55127	0.00161823	2.14402	0.136209	0.152724	0.00909317	-0.0555684	0.0118433	-0.00346455	0.00885871	0.00955556	0.000107515
V18-1c	3	8	1.76	393.859	0.0866923	132.638	0.130103	0.23568	0.000623295	184.363	1.43987	1.25029	0.0033066	0.470866	2.43244	0.0191466	5.22218	0.1551	0.00747314	76.8689	36.723	1.7694	y	y	393.938	0.0866663	132.758	0.130103	1.82543	0.0435182	184.363	1.43987	1.29763	0.00328547	1.39454	0.0467869	0.100591	0.00918298	-0.0296488	0.0254025	-0.047447	0.00932951	0.00699558	0.000300551
V18-1d	4	10	2.14	300.385	0.0691148	87.6611	0.109726	0.182583	0.000496869	183.675	1.37756	0.968612	0.00263591	0.311197	3.66674	0.0278809	3.72665	0.127722	0.00901346	88.61	30.2408	2.13411		y	300.437	0.0691005	87.7806	0.109726	1.27752	0.0261763	183.675	1.37756	1.01579	0.00261169	1.39454	0.0467869	0.100591	0.00918298	-0.0296488	0.0254025	-0.047447	0.00932951	0.00699558	0.000300551
V18-1e	5	14	2.87	355.838	0.0783072	85.0398	0.0809723	0.216173	0.00031835	298.475	1.54909	1.14681	0.00168886	0.301891	6.1422	0.0324101	3.77851	0.158129	0.00600226	100	37.4403	1.42114		y	355.888	0.0782954	85.234	0.0809723	1.26465	0.0447433	298.475	1.54909	1.22346	0.0016404	2.43504	0.0763628	0.198556	0.014028	-0.0349047	0.0243774	0.0116262	0.016162	0.0121947	0.000232026
																						Total gas age = 35.2 ± 2.1 ka (2σ)
Aliquot: V18-2		105.0 mg
V18-2a	1	4	0.96	724.007	1.20941	307.262	0.648709	0.429564	0.000424509	280.947	2.0172	2.27885	0.00225204	1.09078	1.60012	0.0119753	6.02495	0.142003	0.00451342	35.148	33.622	1.06863		y	724.189	1.2094	307.445	0.648709	4.15844	0.0191704	280.947	2.0172	2.35101	0.00219098	1.74584	0.0730284	0.145703	0.0109452	-0.0377704	0.0166012	-0.016518	0.0247937	0.00968816	0.000126914
V18-2b	2	6	1.37	632.133	0.840947	254.252	0.178084	0.374661	0.000739623	236.05	2.47616	1.98759	0.00392373	0.902594	1.62472	0.0170812	6.12351	0.152282	0.00567277	64.232	36.0558	1.34313		y	632.283	0.840937	254.406	0.178084	3.51892	0.0394823	236.05	2.47616	2.04823	0.00387138	1.74584	0.0730284	0.145703	0.0109452	-0.0377704	0.0166012	-0.016518	0.0247937	0.00968816	0.000126914
V18-2c	3	8	1.76	455.204	0.314163	153.359	0.20414	0.270705	0.000328551	199.643	2.10623	1.4361	0.00174298	0.544423	2.27815	0.0242251	5.80748	0.172414	0.00397031	81.7748	40.8224	0.940039			455.295	0.314154	153.489	0.20414	2.21879	0.0323722	199.643	2.10623	1.48741	0.00165644	2.60012	0.198883	0.203926	0.011793	-0.0777893	0.0224056	0.0145193	0.02618	0.012431	0.00038069
V18-2d	4	10	2.14	380.67	0.213209	88.2646	0.0804306	0.232793	0.000781348	185.423	2.21395	1.23498	0.00414508	0.313339	3.67634	0.0440232	3.14013	0.135447	0.0142281	91.8715	32.0699	3.36876		y	380.723	0.213205	88.3852	0.0804306	1.33347	0.0445379	185.423	2.21395	1.28261	0.00410549	2.60012	0.198883	0.203926	0.011793	-0.0777893	0.0224056	0.0145193	0.02618	0.012431	0.00038069
V18-2e	5	14	2.87	395.505	0.12658	71.0592	0.0784047	0.244044	0.000464636	334.717	1.72379	1.29466	0.00246491	0.25226	8.2432	0.0434159	2.26793	0.126243	0.0105095	100	29.8906	2.48832		y	395.547	0.126575	71.277	0.0784047	1.13779	0.0441918	334.717	1.72379	1.38063	0.00242398	2.00698	0.10344	0.131658	0.00911602	-0.0186464	0.0274642	0.0102031	0.0159255	0.0100025	0.000294719
																						Total gas age = 35.1 ± 2.9 ka (2σ)
Aliquot: V18-3		103.9 mg
V18-3a	1	2.5	0.64	309.81	0.0558017	103.87	0.0675578	0.185975	0.000441877	99.5753	2.1558	0.986604	0.00234417	0.36874	1.67764	0.0363372	4.92134	0.146816	0.00676004	11.0984	34.7617	1.60056	y	y	309.872	0.0557769	103.935	0.0675578	1.49828	0.0280329	99.5753	2.1558	1.0122	0.00227761	0.704117	0.0115264	0.00782349	0.021064	-0.0607876	0.0212513	-0.0171281	0.0162285	0.00447585	0.000145313
V18-3b	2	3	0.75	278.12	0.047319	102.178	0.0736111	0.165537	0.000393852	92.0525	2.19177	0.87818	0.0020894	0.362731	1.57659	0.0375557	5.72675	0.155912	0.00612373	22.0159	36.9153	1.4499	y	y	278.181	0.0472907	102.238	0.0736111	1.3901	0.0256056	92.0525	2.19177	0.901816	0.00201193	0.704117	0.0115264	0.00782349	0.021064	-0.0607876	0.0212513	-0.0171281	0.0162285	0.00447585	0.000145313
V18-3c	3	4	0.96	415.806	0.199648	157.355	0.0834473	0.247162	0.000661096	143.058	2.96417	1.3112	0.00350714	0.558609	1.59101	0.0329764	5.85065	0.154637	0.00677472	38.829	36.6134	1.60404	y	y	415.899	0.199632	157.448	0.0834473	2.18965	0.0257722	143.058	2.96417	1.34796	0.00342319	1.19709	0.0451422	0.0414882	0.0139027	-0.0770184	0.0209036	-0.0250711	0.0226977	0.0061895	8.46386e-05
V18-3d	4	6	1.37	1198.79	0.455603	224.554	0.355044	0.734556	0.00110296	242.431	2.0243	3.89685	0.00585122	0.797166	1.88932	0.0160562	2.94783	0.157388	0.00804368	62.8222	37.2648	1.90448	y	y	1198.92	0.455589	224.712	0.355044	3.50578	0.038213	242.431	2.0243	3.95913	0.00582752	2.83974	0.246006	0.185937	0.0201965	-0.0859994	0.0169324	0.0196661	0.010213	0.0117974	0.000127511
V18-3e	5	8	1.76	602.928	0.180917	140.239	0.0617683	0.355883	0.000727151	220.264	3.28193	1.88797	0.00385757	0.497849	2.7486	0.040972	6.50982	0.279914	0.00831413	77.8065	66.2748	1.96849			603.011	0.180903	140.383	0.0617683	2.12711	0.0305028	220.264	3.28193	1.94457	0.0037639	1.95803	0.096531	0.0783343	0.0273551	-0.0933602	0.0210845	0.0112619	0.014683	0.00812378	0.000345949
V18-3f	6	10	2.14	337.481	0.108018	83.3625	0.04843	0.205219	0.000450429	211.26	2.94285	1.0887	0.00238954	0.295937	4.43491	0.061832	3.6855	0.149224	0.00865604	86.7136	35.3318	2.04947			337.531	0.10801	83.5	0.04843	1.24899	0.0215825	211.26	2.94285	1.14296	0.00226643	1.95803	0.096531	0.0783343	0.0273551	-0.0933602	0.0210845	0.0112619	0.014683	0.00812378	0.000345949
V18-3g	7	14	2.87	398.955	0.127682	64.4663	0.0633712	0.236077	0.000457758	304.666	1.95291	1.2524	0.00242843	0.228855	8.27045	0.0536333	6.27548	0.388401	0.0114261	93.6017	91.9604	2.70525			398.993	0.127678	64.6645	0.0633712	1.08113	0.0150494	304.666	1.95291	1.33066	0.00237535	1.69332	0.116467	0.134182	0.0229692	-0.0918458	0.0102087	-0.0161984	0.0162161	0.0086111	0.000421979
V18-3h	8	18	3.57	228.719	0.130383	35.0826	0.0264281	0.138095	0.000647022	237.996	2.80835	0.732598	0.00343248	0.124543	11.8718	0.140372	4.36935	0.284883	0.0294473	97.3503	67.4512	6.97206			228.74	0.130382	35.2375	0.0264281	0.624182	0.0186443	237.996	2.80835	0.793739	0.00335537	1.69332	0.116467	0.134182	0.0229692	-0.0918458	0.0102087	-0.0161984	0.0162161	0.0086111	0.000421979
V18-3i	9	25	4.76	178.885	0.148487	24.799	0.050084	0.107218	0.00024601	181.911	3.03064	0.568795	0.00130509	0.0880366	12.837	0.21543	5.06713	0.365541	0.0168307	100	86.5481	3.98485			178.899	0.148486	24.9174	0.050084	0.391206	0.0101948	181.911	3.03064	0.615504	0.00104709	1.61672	0.066334	0.130776	0.0153701	-0.0450792	0.00448222	0.0321793	0.0184915	0.00868501	0.000302548
																						Total gas age = 47.2 ± 4.2 ka (2σ)
Aliquot: V18-6		93.6 mg
V18-6a	1	2.5	0.64	119.375	0.0465776	55.9153	0.0447581	0.069777	0.000364701	49.725	4.98593	0.37017	0.00193475	0.198499	1.55626	0.156051	7.41721	0.158395	0.0103649	6.8853	37.5033	2.45408	y	y	119.408	0.046569	55.9477	0.0447581	0.780364	0.0273049	49.725	4.98593	0.382954	0.00145022	1.7073	0.0278119	-0.0298182	0.0218934	-0.080485	0.0147175	0.000713	0.0248845	0.00796589	0.000281206
V18-6b	2	3.5	0.75	407.918	0.0490225	153.126	0.148621	0.24342	0.000748902	140.874	4.50091	1.29135	0.00397296	0.543596	1.60998	0.0514625	5.48316	0.146101	0.00775427	25.7409	34.5924	1.83596	y	y	408.009	0.0489611	153.217	0.148621	2.07136	0.0252291	140.874	4.50091	1.32752	0.00380071	1.7073	0.0278119	-0.0298182	0.0218934	-0.080485	0.0147175	0.000713	0.0248845	0.00796589	0.000281206
V18-6c	3	4	0.96	231.692	0.0741812	106.564	0.0735731	0.136346	0.000225758	97.5222	3.2865	0.723321	0.00119766	0.378303	1.60151	0.0539823	6.79038	0.147677	0.00342843	38.863	34.9654	0.811743	y	y	231.755	0.0741616	106.628	0.0735731	1.41381	0.0146753	97.5222	3.2865	0.748362	0.000849457	2.34588	0.054753	0.0147347	0.0287133	-0.0914997	0.012842	-0.0398333	0.0170937	0.00974288	0.000372864
V18-6d	4	4.5	1.07	174.359	0.0924494	89.0366	0.0703813	0.101048	0.000454326	82.3713	3.76354	0.536063	0.00241021	0.31608	1.61899	0.0739829	8.20597	0.160745	0.00814941	49.8268	38.0596	1.92952	y	y	174.412	0.0924384	89.0902	0.0703813	1.12243	0.0420125	82.3713	3.76354	0.557195	0.00220765	2.34588	0.054753	0.0147347	0.0287133	-0.0914997	0.012842	-0.0398333	0.0170937	0.00974288	0.000372864
V18-6e	5	5	1.17	144.93	0.150776	71.649	0.0552006	0.0853229	0.000241318	61.582	3.88521	0.452641	0.0012802	0.254354	1.50412	0.0949019	6.75271	0.136633	0.00573561	58.6495	32.3506	1.35801	y	y	144.973	0.150772	71.689	0.0552006	1.00504	0.0193571	61.582	3.88521	0.468478	0.000801908	2.30312	0.0492176	0.0644273	0.0142868	-0.0893035	0.00481882	-0.0316562	0.0154368	0.00969355	8.97933e-05
V18-6f	6	5.5	1.27	146.717	0.205458	61.8575	0.127516	0.0861411	0.00033234	66.616	4.87629	0.456982	0.00176308	0.219594	1.88462	0.138009	7.0055	0.166202	0.0091413	66.2665	39.3517	2.16436	y	y	146.754	0.205456	61.9009	0.127516	0.860025	0.0226874	66.616	4.87629	0.4741	0.00124084	2.30312	0.0492176	0.0644273	0.0142868	-0.0893035	0.00481882	-0.0316562	0.0154368	0.00969355	8.97933e-05
V18-6g	7	6	1.37	116.728	0.11209	49.3717	0.0286561	0.0691112	0.000243627	54.4932	3.48484	0.366638	0.00129245	0.175269	1.93154	0.123527	6.22228	0.147149	0.00813922	72.346	34.8405	1.92711	y	y	116.758	0.112087	49.4071	0.0286561	0.716355	0.0448725	54.4932	3.48484	0.380652	0.000932158	2.42921	0.0197252	0.0334747	0.0197146	-0.0836865	0.0231435	-0.00174555	0.0177105	0.0100603	0.000108221
V18-6h	8	8	1.76	278.146	0.0973761	79.9214	0.0568111	0.168493	0.000362868	144.764	4.15618	0.893863	0.00192503	0.283721	3.16983	0.0910337	4.05265	0.141066	0.00729446	82.1874	33.4003	1.7271	y	y	278.193	0.0973676	80.0156	0.0568111	1.18772	0.0250609	144.764	4.15618	0.93106	0.00160167	2.42921	0.0197252	0.0334747	0.0197146	-0.0836865	0.0231435	-0.00174555	0.0177105	0.0100603	0.000108221
V18-6i	9	10	2.14	238.538	0.0620371	61.4008	0.0528952	0.145103	0.00042609	161.609	4.02891	0.769777	0.00226043	0.217973	4.60605	0.114897	3.6522	0.141907	0.0110383	89.7482	33.5994	2.61351	y	y	238.574	0.0620293	61.506	0.0528952	0.841244	0.0336161	161.609	4.02891	0.811261	0.00200933	8.55519	0.031312	0.0649569	0.0201802	-0.0855014	0.0156228	0.00184027	0.0156422	0.0295579	0.000402854
V18-6j	10	14	2.87	306.384	0.0949928	54.1854	0.0380715	0.187272	0.000470158	311.053	4.63468	0.993487	0.00249421	0.192358	10.0459	0.14985	3.18784	0.180271	0.0138549	96.4204	42.6827	3.28039		y	306.416	0.0949889	54.3879	0.0380715	0.916798	0.049067	311.053	4.63468	1.0734	0.002191	1.59389	0.023191	-0.0349026	0.023243	-0.0546494	0.0157653	-0.0239391	0.0185909	0.00725687	0.000166536
V18-6k	11	18	3.57	246.625	0.0591959	29.0695	0.0598628	0.152825	0.000397273	202.677	3.7333	0.810742	0.00210755	0.103197	12.2013	0.226147	1.85266	0.15719	0.0217437	100	37.2179	5.14821		y	246.642	0.059194	29.2014	0.0598628	0.553266	0.03277	202.677	3.7333	0.862809	0.00187634	1.59389	0.023191	-0.0349026	0.023243	-0.0546494	0.0157653	-0.0239391	0.0185909	0.00725687	0.000166536
																						Total gas age = 35.8 ± 4.0 ka (2σ)
a Data are corrected for mass spectrometer backgrounds, discrimination, radioactive decay and interference reactions. Errors are one sigma uncertainties and exclude uncertainties in the J-value.
b Samples were irradiated in can UM#54 for 0.5 MWhr in the OSTR CLICIT facility. Interference corrections: (36Ar/37Ar)Ca = (2.5680 ± 0.0017) x 10-4; (39Ar/37Ar)Ca = (6.5075 ± 0.0033) x 10-4; (40Ar/39Ar)K = (5.93 ± 0.16) x 10-4; (38Ar/39Ar)K = (1.2055 ± 0.0007) x 10-2
c Apparent ages calculated using a J-value of 0.0001312431 ± 0.000000084 ( 0.064%;1σ ), calculated based on an age of 1.18144 ± 0.00034 Ma (1σ) for AC sanidine (Phillips et al., 2017).

## Sheet: Table DR2 VIC25
Table DR2. ARGUSVI 40Ar/39Ar laser step-heating analytical results for basalt groundmass sample VIC25
				Intensities corrected for procedural blanks, mass discrimination radioactive decaya										Intensities also corrected for interference reactions b																	Procedural blanks
Lab ID	Step no.	Laser power (%)	Laser power (W)	36Ar [V]	%1σ	37Ar [V]	%1σ	38Ar [V]	%1σ	39Ar [V]	%1σ	40Ar [V]	%1σ	36Ar(a) [V]	%1σ	38Ar(a) [V]	%1σ	39Ar(K) [V]	%1σ	40Ar(a+r) [V]	%1σ	40(r)/39(k)	± 2σ	Age (ka) c	± 2σ	40Ar(r) (%)	K/Ca	± 2σ	Included in plateau?	Included in composite isochron?	36Ar [V]	1σ	37Ar [V]	1σ	38Ar [V]	1σ	39Ar [V]	1σ	40Ar [V]	1σ
Aliquot VIC25-B (100 mg)
5M7640	1	2	2	0.0004462	0.587921	0.00351858	28.701	0.000161558	88.3031	0.00301164	0.827615	0.13406	0.375896	0.000445236	0.592471	8.32146e-05	0.600851	0.00300897	0.828744	0.134058	0.375902	0.374814	0.618117	66.2154	108.534	0.841285	0.367722	0.211167		y	3.36124e-05	2.20694e-06	9.97883e-05	1.25692e-05	-1.35252e-05	0.000138548	-1.47425e-05	2.05397e-05	0.00953811	0.00050355
5M7641	2	3	3	0.000517117	0.518104	0.0141798	6.47619	0.000432457	33.2755	0.013736	0.167095	0.156383	0.322209	0.000513232	0.524385	9.5923e-05	0.533835	0.0137252	0.167306	0.156373	0.322231	0.228936	0.13702	40.4445	24.0594	2.00943	0.416215	0.0539277		y	3.35247e-05	2.20694e-06	9.97883e-05	1.25692e-05	1.61872e-05	0.000138548	-1.23781e-05	2.05397e-05	0.00954527	0.00050355
5M7642	3	4	4	0.000434758	0.595703	0.0296525	4.92822	0.00099863	14.1143	0.0321396	0.108665	0.133779	0.376625	0.000426574	0.614481	7.97267e-05	0.622565	0.032117	0.1088	0.133756	0.376697	0.199208	0.0567159	35.1927	9.95883	4.78331	0.465739	0.0459165		y	3.33763e-05	2.20694e-06	9.97883e-05	1.25692e-05	4.06272e-05	0.000138548	-8.51984e-06	2.05397e-05	0.00952358	0.00050355
5M7643	4	6	6	0.000613599	0.448962	0.0729918	4.18208	0.00207606	6.88192	0.0910395	0.0581732	0.196679	0.256436	0.000593606	0.485543	0.000110945	0.495734	0.0909841	0.0582691	0.196612	0.256557	0.21306	0.0207106	37.6399	3.6366	9.85956	0.535994	0.0448358		y	3.31938e-05	2.20694e-06	9.97883e-05	1.25692e-05	5.73407e-05	0.000138548	-3.84519e-06	2.05397e-05	0.0094793	0.00050355
5M7645	5	8	8	0.000576896	0.485463	0.0627397	4.18263	0.00216043	6.54112	0.0948971	0.0567213	0.187718	0.268503	0.000559656	0.51725	0.0001046	0.526828	0.0948494	0.056792	0.187649	0.268641	0.21674	0.0201396	38.29	3.53634	10.9554	0.650071	0.0543851		y	3.27178e-05	2.20694e-06	9.97883e-05	1.25692e-05	7.53562e-05	0.000138548	8.25196e-06	2.05397e-05	0.0093291	0.00050355
5M7646	6	9	9	0.000627224	0.423811	0.0409871	4.44742	0.001631	8.68043	0.068254	0.0640605	0.202734	0.248644	0.000615929	0.439446	0.000115117	0.45068	0.0682228	0.0641243	0.202684	0.248724	0.275457	0.0272128	48.663	4.7783	9.27179	0.715732	0.0636699			3.24379e-05	2.20694e-06	9.97883e-05	1.25692e-05	7.72498e-05	0.000138548	1.53549e-05	2.05397e-05	0.00922838	0.00050355
5M7647	7	10	10	0.000748354	0.386589	0.0383339	4.58193	0.00153515	9.33472	0.0641746	0.0645335	0.235362	0.214247	0.000737799	0.397718	0.000137895	0.410097	0.0641455	0.0645987	0.235315	0.214304	0.234436	0.030859	41.4162	5.41856	6.39058	0.719535	0.0659436	y	y	3.21652e-05	2.20694e-06	9.97883e-05	1.25692e-05	7.52563e-05	0.000138548	2.22821e-05	2.05397e-05	0.00912443	0.00050355
5M7648	8	12	12	0.00187605	0.247987	0.0726994	4.10062	0.00301785	4.69437	0.114053	0.0543011	0.582817	0.086483	0.00185599	0.254661	0.000346884	0.273591	0.113997	0.0543668	0.582734	0.0865135	0.250966	0.0256813	44.3364	4.5094	4.90953	0.674268	0.0553033	y	y	3.18724e-05	2.20694e-06	9.97883e-05	1.25692e-05	6.97651e-05	0.000138548	2.97444e-05	2.05397e-05	0.00900726	0.00050355
5M7650	9	14	14	0.00171153	0.255347	0.109164	4.02743	0.00339515	4.19748	0.131539	0.0543502	0.531346	0.0948223	0.00168156	0.26985	0.000314283	0.287783	0.131456	0.0544491	0.53125	0.0948659	0.222157	0.0209584	39.247	3.68012	5.49721	0.517809	0.0417126	y	y	3.13339e-05	2.20694e-06	9.97883e-05	1.25692e-05	5.17798e-05	0.000138548	4.35936e-05	2.05397e-05	0.0087768	0.00050355
5M7651	10	16	16	0.00170397	0.251322	0.15027	4.00962	0.00316286	4.50614	0.118969	0.054658	0.528881	0.095424	0.00166293	0.276257	0.000310802	0.293799	0.118854	0.0548582	0.528794	0.0954614	0.271845	0.0226518	48.0248	3.97743	6.11012	0.340104	0.0272763	y	y	3.1089e-05	2.20694e-06	9.97883e-05	1.25692e-05	4.00367e-05	0.000138548	4.99949e-05	2.05397e-05	0.00866398	0.00050355
5M7652	11	18	18	0.00118851	0.305425	0.201195	3.98237	0.00252743	5.60511	0.0968812	0.0563865	0.362681	0.138955	0.00113381	0.37459	0.000211908	0.387708	0.0967283	0.0568571	0.36261	0.139003	0.249161	0.023784	44.0175	4.17625	6.64651	0.206731	0.0164673	y	y	3.08909e-05	2.20694e-06	9.97883e-05	1.25692e-05	2.83164e-05	0.000138548	5.52712e-05	2.05397e-05	0.00856679	0.00050355
5M7653	12	20	20	0.000857061	0.33777	0.216505	3.99125	0.0018384	7.74658	0.0732666	0.0619508	0.256431	0.196766	0.00079834	0.469069	0.00014921	0.47961	0.073102	0.0627949	0.256377	0.196824	0.246575	0.025997	43.5607	4.56484	7.03071	0.145188	0.011591	y	y	3.0722e-05	2.20694e-06	9.97883e-05	1.25692e-05	1.5711e-05	0.000138548	5.99134e-05	2.05397e-05	0.00847616	0.00050355
5M7655	13	21	21	0.000530859	0.490208	0.133314	4.01184	0.00111295	12.7018	0.0422719	0.0761	0.159568	0.315619	0.000494695	0.604202	9.24585e-05	0.612422	0.0421706	0.0769434	0.159537	0.315689	0.280782	0.0418305	49.6036	7.34503	7.42193	0.13602	0.0109158	y	y	3.05541e-05	2.20694e-06	9.97883e-05	1.25692e-05	-6.47801e-06	0.000138548	6.51871e-05	2.05397e-05	0.00835393	0.00050355
5M7656	14	22	22	0.000424373	0.616449	0.0970152	4.14955	0.000784369	18.1306	0.0288481	0.113689	0.126226	0.399224	0.000398059	0.713504	7.43973e-05	0.720477	0.0287743	0.114517	0.126205	0.399296	0.255801	0.0618077	45.1906	10.8528	5.83219	0.127536	0.0105884	y	y	3.05646e-05	2.20694e-06	9.97883e-05	1.25692e-05	-1.49547e-05	0.000138548	6.55866e-05	2.05397e-05	0.00832718	0.00050355
5M7657	15	24	24	0.000544466	0.498766	0.115319	4.01535	0.00097195	14.5287	0.033675	0.0909825	0.175675	0.286801	0.000513174	0.584438	9.59122e-05	0.592931	0.0335873	0.091873	0.175651	0.286846	0.668037	0.054518	118.015	9.57246	12.774	0.12524	0.0100603			3.06537e-05	2.20694e-06	9.97883e-05	1.25692e-05	-2.15078e-05	0.000138548	6.41848e-05	2.05397e-05	0.00832704	0.00050355
5M7658	16	26	26	0.000333253	0.733093	0.0956392	4.08546	0.000717834	19.5806	0.0237813	0.118993	0.096798	0.520695	0.000307306	0.86838	5.74355e-05	0.874119	0.0237086	0.12007	0.0967807	0.520793	0.21222	0.0709045	37.4915	12.4502	5.19881	0.106595	0.00871358			3.08182e-05	2.20694e-06	9.97883e-05	1.25692e-05	-2.47172e-05	0.000138548	6.09617e-05	2.05397e-05	0.00835711	0.00050355
5M7660	17	28	28	0.000279483	0.84036	0.0961258	4.06254	0.000675701	20.9654	0.0237912	0.107098	0.0856415	0.588485	0.000253415	1.01899	4.73633e-05	1.02389	0.0237182	0.108218	0.0856242	0.588609	0.420119	0.0684207	74.2188	12.0138	11.6374	0.106099	0.00862364			3.14408e-05	2.20694e-06	9.97883e-05	1.25692e-05	-1.98678e-05	0.000138548	4.76401e-05	2.05397e-05	0.00852658	0.00050355
5M7661	18	30	30	0.00026998	0.887901	0.0904803	4.09433	0.000526223	27.0858	0.0187401	0.138226	0.0792512	0.63564	0.000245466	1.06097	4.58777e-05	1.06567	0.0186713	0.139622	0.0792375	0.635753	0.318731	0.0881523	56.3077	15.4786	7.51048	0.0887338	0.00727032			3.1929e-05	2.20694e-06	9.97883e-05	1.25692e-05	-9.9996e-06	0.000138548	3.68265e-05	2.05397e-05	0.0086784	0.00050355
5M7662	19	35	35	0.000361001	0.665704	0.109341	4.05627	0.00063226	22.6005	0.0217415	0.118807	0.163505	0.308382	0.000331377	0.813123	6.19344e-05	0.819249	0.0216584	0.120363	0.163489	0.308414	2.98052	0.0769224	526.476	13.5033	39.4847	0.0851747	0.00691287			3.25009e-05	2.20694e-06	9.97883e-05	1.25692e-05	4.61621e-06	0.000138548	2.39905e-05	2.05397e-05	0.00886533	0.00050355
5M7663	20	40	40	0.00031209	0.823874	0.100094	4.0571	0.000455912	31.0776	0.0175497	0.150136	0.100039	0.505172	0.000285002	0.98347	5.32669e-05	0.988541	0.0174736	0.151911	0.100026	0.505239	0.854751	0.0989485	150.998	17.3734	14.9318	0.0750664	0.00609531			3.32415e-05	2.20694e-06	9.97883e-05	1.25692e-05	2.65835e-05	0.000138548	7.208e-06	2.05397e-05	0.00911618	0.00050355
Aliquot VIC25-A (100 mg)
4M5073	1	2	2	0.000589634	0.404917	0.00655086	3.65424	0.000207219	18.2964	0.00641261	0.592207	0.177468	0.784915	0.000587861	0.406296	0.000109871	0.418421	0.00640763	0.592675	0.177463	0.784936	0.304512	0.488115	53.7958	85.708	1.09949	0.420598	0.031141	y	y	5.17931e-05	2.02692e-06	9.22424e-05	1.16934e-05	-3.01705e-05	2.87776e-05	3.02792e-05	3.67408e-05	0.0141285	0.00139285
4M5074	2	3	3	0.000525896	0.50136	0.024076	2.57209	0.000522484	6.02515	0.0242542	0.163106	0.160268	0.861055	0.00051937	0.50878	9.70702e-05	0.518515	0.0242359	0.163244	0.160251	0.861151	0.214044	0.13071	37.8137	22.9516	3.23714	0.432856	0.0223117	y	y	5.49895e-05	2.0081e-06	9.70248e-05	1.16934e-05	-3.01705e-05	2.87776e-05	5.09574e-05	3.63997e-05	0.0150838	0.00137991
4M5075	3	4	4	0.000420477	0.527837	0.0353319	2.49269	0.000746359	4.14907	0.0417539	0.101127	0.133083	1.02737	0.000410905	0.543562	7.67982e-05	0.552684	0.0417271	0.101207	0.133053	1.02761	0.248583	0.0725137	43.9153	12.7327	7.79589	0.507832	0.0253382	y	y	5.57917e-05	1.98941e-06	9.8056e-05	1.16934e-05	-3.01705e-05	2.87776e-05	7.12315e-05	3.60609e-05	0.0154191	0.00136707
4M5076	4	6	6	0.000482439	0.532045	0.0512212	2.43747	0.00135268	2.45774	0.0733192	0.060257	0.156622	0.865899	0.000468535	0.553122	8.75692e-05	0.562089	0.0732803	0.0603063	0.156569	0.866205	0.22766	0.0422224	40.219	7.41387	10.6554	0.615185	0.029999	y	y	5.47782e-05	1.97323e-06	9.64628e-05	1.16934e-05	-3.01705e-05	2.87776e-05	8.95542e-05	3.57675e-05	0.0152427	0.00135595
4M5078	5	8	8	0.000846859	0.288363	0.0466111	2.44197	0.00155518	2.04277	0.0764462	0.0579662	0.266664	0.500834	0.00083418	0.295365	0.000155908	0.311834	0.0764108	0.0580067	0.266608	0.500946	0.229748	0.0396919	40.5879	6.96954	6.58465	0.70491	0.0344371	y	y	4.95009e-05	1.94316e-06	8.95209e-05	1.16934e-05	-3.01705e-05	2.87776e-05	0.000129813	3.52225e-05	0.0138621	0.00133529
4M5079	6	9	9	0.00109733	0.223147	0.0420612	2.45686	0.00151629	2.16248	0.0721255	0.0634569	0.340745	0.389601	0.00108589	0.227157	0.000202953	0.248194	0.0720935	0.0634966	0.340692	0.389666	0.228718	0.0419433	40.4061	7.36487	4.83989	0.737026	0.0362275	y	y	4.65747e-05	1.93122e-06	8.64107e-05	1.16934e-05	-3.01705e-05	2.87776e-05	0.000150338	3.50061e-05	0.0129756	0.00132708
4M5080	7	10	10	0.000625515	0.36031	0.0434702	2.46194	0.00113497	3.07462	0.0595885	0.0721713	0.197656	0.667634	0.000613719	0.3706	0.000114704	0.383855	0.0595554	0.0722274	0.197612	0.667786	0.241458	0.0495538	42.6567	8.70119	7.27695	0.589113	0.0290196	y	y	4.37199e-05	1.92005e-06	8.42123e-05	1.16934e-05	-3.01705e-05	2.87776e-05	0.000173856	3.48035e-05	0.0120001	0.0013194
4M5081	8	12	12	0.00115376	0.229264	0.083119	2.42661	0.00165917	2.02566	0.0804896	0.0585163	0.355734	0.369205	0.00113122	0.23926	0.000211425	0.259317	0.0804264	0.0586008	0.355676	0.369272	0.223041	0.0379154	39.4031	6.65762	5.04347	0.41607	0.0201987	y	y	4.16009e-05	1.91105e-06	8.37109e-05	1.16934e-05	-3.01705e-05	2.87776e-05	0.000197523	3.46405e-05	0.0111337	0.00131323
4M5083	9	14	14	0.00109786	0.237492	0.124208	2.4259	0.00159738	2.01658	0.075128	0.0582185	0.337103	0.386763	0.00106423	0.257771	0.000198905	0.276488	0.0750336	0.0583911	0.337048	0.386831	0.257363	0.0401546	45.4664	7.05077	5.72941	0.259762	0.0126068	y	y	3.98238e-05	1.89711e-06	8.88078e-05	1.16934e-05	-3.01705e-05	2.87776e-05	0.00025087	3.43878e-05	0.00973122	0.00130364
4M5084	10	16	16	0.000853878	0.276627	0.141794	2.4234	0.00130135	2.57315	0.0612344	0.0667455	0.307322	0.423206	0.000815513	0.313179	0.000152419	0.328757	0.0611266	0.067033	0.307278	0.423271	1.0437	0.0479427	184.377	8.41763	20.7624	0.18537	0.00898797			4.05472e-05	1.89239e-06	9.49786e-05	1.16934e-05	-3.01705e-05	2.87776e-05	0.00027998	3.43023e-05	0.00929841	0.0013004
4M5085	11	18	18	0.00141641	0.236145	0.131055	2.4232	0.00114942	2.85199	0.0414546	0.102099	0.430249	0.30188	0.00138094	0.250772	0.000258098	0.269975	0.041355	0.102552	0.430219	0.301902	0.433415	0.0785076	76.5676	13.785	4.16623	0.135689	0.0065819			4.22825e-05	1.88953e-06	0.000102894	1.16934e-05	-3.01705e-05	2.87776e-05	0.000307476	3.42503e-05	0.00910154	0.00129843
4M5086	12	20	20	0.000463421	0.514417	0.105712	2.42707	0.000804235	4.15375	0.0255981	0.165484	0.125642	1.03275	0.000434795	0.573052	8.12631e-05	0.581711	0.0255177	0.166224	0.125624	1.0329	-0.164143	0.114378	-28.9985	20.0846	N/A	0.103797	0.00505028			4.51944e-05	1.88813e-06	0.000113359	1.16934e-05	-3.01705e-05	2.87776e-05	0.000336158	3.4225e-05	0.00911763	0.00129747
4M5088	13	21	21	0.000337834	0.83009	0.0633684	2.51407	0.00134678	3.4187	0.014546	0.528991	0.0496361	2.61747	0.000320494	0.88613	5.99004e-05	0.891754	0.0144978	0.530829	0.0496255	2.61803	-3.17711	0.212742	-561.371	37.3679	N/A	0.0983782	0.00505565			5.33019e-05	1.89031e-06	0.000137815	1.16934e-05	-3.01705e-05	2.87776e-05	0.00038553	3.42646e-05	0.00974767	0.00129897
4M5089	14	22	22	0.000405082	0.903189	0.0664433	2.51847	0.00169573	2.77094	0.0153887	0.242685	0.0668408	1.94718	0.000386844	0.953583	7.23011e-05	0.958812	0.0153382	0.243657	0.0668296	1.94751	-3.17288	0.218035	-560.624	38.2977	N/A	0.0992643	0.00502322			5.79014e-05	1.89368e-06	0.000150429	1.16934e-05	-3.01705e-05	2.87776e-05	0.000404007	3.43257e-05	0.0102688	0.00130129
4M5090	15	24	24	0.000452394	0.611687	0.0727149	2.462	0.00153203	3.2198	0.0177794	0.481368	0.0777486	1.67932	0.000432504	0.650387	8.08351e-05	0.658029	0.0177242	0.482944	0.0777357	1.6796	-2.89959	0.17444	-512.329	30.6394	N/A	0.104812	0.00525931			6.28075e-05	1.89893e-06	0.000163314	1.16934e-05	-3.01705e-05	2.87776e-05	0.000417724	3.44208e-05	0.0109053	0.0013049
4M5091	16	26	26	0.000128973	1.61519	0.0454846	2.44953	0.000399206	8.89915	0.00813225	0.440352	0.0313653	4.17573	0.000116635	1.80628	2.17991e-05	1.80905	0.00809768	0.442385	0.0313594	4.17652	-0.427665	0.35207	-75.555	61.8243	N/A	0.0765534	0.00381106			6.72283e-05	1.90587e-06	0.000174516	1.16934e-05	-3.01705e-05	2.87776e-05	0.00042336	3.45465e-05	0.0115455	0.00130966
4M5093	17	28	28	4.58266e-05	4.3335	0.0337958	2.46679	0.000182949	18.8579	0.00478093	0.780762	0.0155062	8.52667	3.66774e-05	5.4523	6.85501e-06	5.45322	0.00475524	0.785119	0.0155028	8.52858	0.957332	0.591009	169.119	103.768	29.3647	0.0605032	0.00313252			7.21644e-05	1.92405e-06	0.000186459	1.16934e-05	-3.01705e-05	2.87776e-05	0.000403092	3.4876e-05	0.0124149	0.00132215
4M5094	18	30	30	6.66782e-05	3.01003	0.0380742	2.49523	0.000168868	21.7612	0.0060517	0.612692	0.0219149	6.06791	5.63809e-05	3.5913	1.05376e-05	3.59269	0.00602276	0.61578	0.0219105	6.06913	0.843035	0.472665	148.929	82.9908	23.1734	0.0680195	0.00349633			7.16006e-05	1.93505e-06	0.000184924	1.16934e-05	-3.01705e-05	2.87776e-05	0.000374253	3.50754e-05	0.0124449	0.00132971
4M5095	19	35	35	0.000122454	1.75387	0.055434	2.45236	0.000176978	23.7416	0.00658856	0.601482	0.0556214	2.40717	0.000107471	2.03	2.00864e-05	2.03246	0.00654643	0.605608	0.0556166	2.40738	3.59433	0.445813	634.88	78.255	42.3075	0.0507805	0.00256546			6.7857e-05	1.94832e-06	0.000175828	1.16934e-05	-3.01705e-05	2.87776e-05	0.000326422	3.53161e-05	0.0120151	0.00133884
4M5096	20	40	40	7.42349e-05	2.87554	0.0401947	2.4518	0.000102867	33.4207	0.00407535	0.922373	0.023961	5.62879	6.3374e-05	3.3968	1.18446e-05	3.39827	0.0040448	0.929568	0.0239581	5.62948	1.24534	0.719474	219.994	126.321	21.0248	0.043271	0.00226922			6.06003e-05	1.9622e-06	0.000158593	1.16934e-05	-3.01705e-05	2.87776e-05	0.000263004	3.55675e-05	0.0110352	0.00134837
a Data corrected for mass spectrometer backgrounds, discrimination and radioactive decay.
b Interference correction values applied prior to age calculation are: (39Ar/37Ar)Ca = (7.60 ± 0.09) × 10-4; (36Ar/37Ar)Ca = (2.70 ± 0.02) × 10-4; (40Ar/39Ar)K = (7.30 ± 0.90) × 10-4; and (38Ar/39Ar) K = (1.24 ± 0.004) × 10-2 (Jourdan and Renne, 2007).
c Apparent ages calculated using a J-value of 0.00009793 ± 0.00000031 (1σ), calculated based on an age of 28.126 Ma + 0.019 Ma for FC sanidine (Phillips et al., 2017).

## Sheet: Table DR3 age summary
Table DR3. Summary of 40Ar/39Ar results from step-heating experiments on groundmass aliquots of samples NVP18 and VIC25
		Age spectrum a						Inverse isochron analysis
Sample no.	Aliquot no.	Increments
		used for plateau/wm	39Ar%	MSWD	p	Age (ka) ± 2σ a		40Ar/36Ari ± 2σ	MSWD	p	n	Age (ka) ± 2σ
NVP18 (J = 0.0001312431 ± 0.000000084 (1σ))
	V18-1	steps 1–3 (4–8% laser power)	76.9	0.33	0.72	35.3 ± 0.7		297.7 ± 7.4 (95% CI)	2.7	0.05	5	37 ± 19 (95% CI)
	V18-2	N/A	N/A	N/A	N/A	N/A		296.4 ± 7.9	12	0	5	40 ± 23
	V18-3	steps 1–4 (2.5–6% laser power)	62.8	0.46	0.71	36.4 ± 1.6		298.8 ± 1.9	0.52	0.67	5	35.6 ± 5.2
	V18-6	steps 1–9 (2.5–10% laser power)	89.7	1.6	0.13	34.9 ± 1.0		298.5 ± 2.7 (95% CI)	1.9	0.05	11	36.0 ± 5.5 (95% CI)
			Weighted mean age (V18-1,2,3,6; n = 24):	1.7	0.02	35.2 ± 0.7 (95% CI)		Composite inverse isochron (V18-1,2,3,6):
								297.9 ± 1.5	1.7	0.02	24	36.9 ± 3.1 (95% CI)
VIC25 (J = 0.00009793 ± 0.00000031 (1σ))
	VIC25-A	steps 1–9 (2–14% laser power)	71.3	0.29	0.97	41.5 ± 2.9		Composite inverse isochron (VIC25-A, B):
								301.0 ± 1.8	1.04	0.41	22	36.8 ± 3.8
	VIC25-B	steps 7–14 (10–22% laser power)	60.2	2	0.05	43.8 ± 1.7
a 'Model' age spectrum calculated assuming (40Ar/36Ar)trapped = 298.56.
