# Supplementary material
Source: publisher figshare collection journal article supplement (https://gsapubs.figshare.com/articles/dataset/_/12542561)
Supplement: Supplementary file 1 [file 1]

Matchan, E.L., Phillips, D., Jourdan, F., and Oostingh, K., 2020, Early human occupation of southeastern Australia: New insights from  $^{40}\text{Ar}/^{39}\text{Ar}$  dating of young volcanoes: *Geology*, v. 48, <https://doi.org/10.1130/G47166.1>

## 1 Data Repository Item: Material, Methods and Analytical 2 Results

### 3 SAMPLE COLLECTION

4 The NVP18 basalt sample was collected from the Tyrendarra Quarry, Princes Hwy  
5 Tyrendarra (Fig 1; coordinates:  $38^{\circ}13.97'$  S,  $141^{\circ}46.25'$  E WGS84). A fresh, well-  
6 crystallised section through the Tyrendarra lava flow is exposed in the western wall of the  
7 quarry at approximately 2 m depth from surface, and it is from this section that a ~1 kg  
8 block of basalt (NVP18) was collected using a sledgehammer.

9 The VIC25 lava bomb, measuring approximately 15 cm in length, was collected *in situ*  
10 from the south-western wall of the Tower Hill maar in a ~30 m-thick section of  
11 phreatomagmatic deposits exposed by historical quarrying activity (CRB Quarry) at the  
12 entrance of what is now the Tower Hill Wildlife Reserve, approximately 12 km northwest  
13 of Warrnambool (Fig. 1; coordinates:  $38^{\circ}19.61'$  S,  $142^{\circ}22.10'$  E).

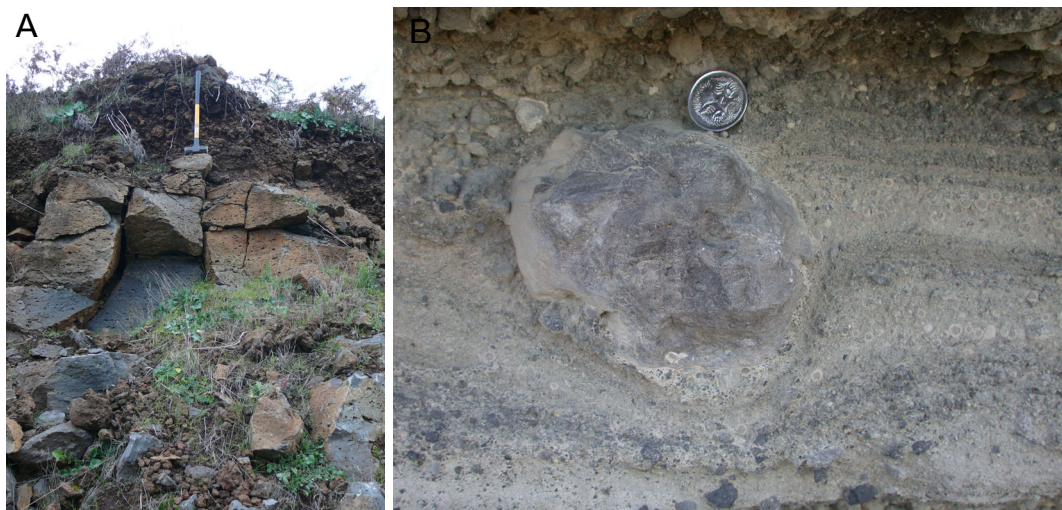

14  
15 **Figure DR1** A. Section of Tyrendarra basalt from which NVP18 was collected.  
16 Sledgehammer is approximately 1 m long. B. *In situ* lava bomb in the exposed Tower Hill  
17 phreatomagmatic sequence from which VIC25 was collected. The bomb penetrates beds of  
18 ash (pale grey) and fine scoria (dark grey), with some ash layers exhibiting accretionary  
19 lapilli. Coin is approximately 2 cm in diameter.

## 20 PETROGRAPHY

### 21 NVP18

22 Small phenocrysts of plagioclase (laths  $\leq 0.8$  mm), olivine and clinopyroxene are set in a  
23 coarsely crystalline groundmass dominated by plagioclase, clinopyroxene, olivine and  
24 magnetite (Fig. DR2a,b). The average olivine phenocryst size is 0.4 mm and clinopyroxene  
25 phenocrysts are smaller (typically ca. 0.2 mm) and less abundant. Abundant apatite needles  
26 are present in interstitial pools of feldspar. A minor amount of glass ( $<1\%$  by volume) is  
27 present. Small vesicles ( $\leq 0.5$  mm) comprise  $\sim 5\%$  by volume.

### 28 VIC25

29 Microphenocrysts of clinopyroxene ( $\leq 0.1$  mm) and olivine occur in a fine-grained  
30 groundmass dominated by plagioclase, clinopyroxene, olivine, opaques (magnetite?),  
31 apatite, and glass ( $\sim 10\%$  glass by volume; Fig. DR2c,d).

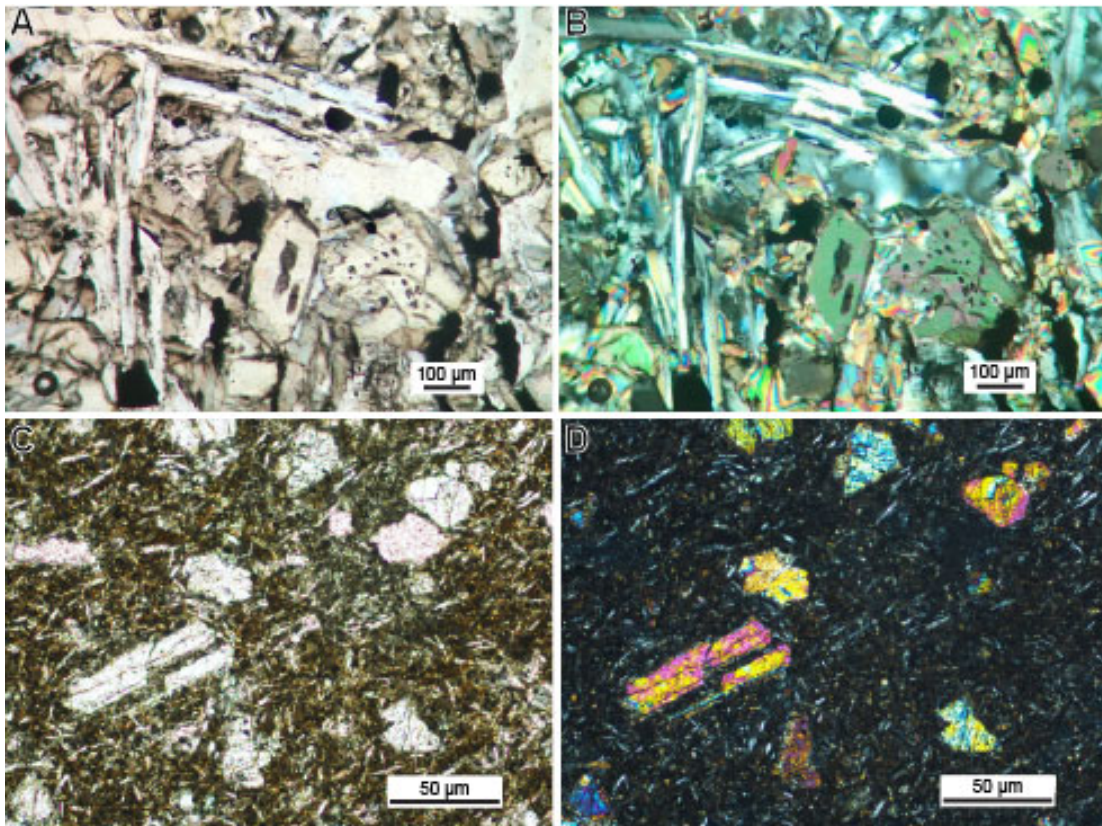

32  
33 **Figure DR2** A. Photomicrograph of sample NVP18 (plane polarised light). B. NVP18  
34 (cross-polarised light). C. VIC25 (plane polarised light). D. VIC25 (cross-polarised light).

## 35 ANALYTICAL METHODS

### 36 NVP18

37 Sample preparation and analytical procedures followed those described in Matchan and  
38 Phillips (2014). Approximately 1 kg of sample was crushed to 2 cm sized chips using a jaw  
39 crusher. Individual chips were then screened for alteration and large vesicles, with  
40 acceptable chips crushed manually using a steel piston crusher. Crushed fragments were  
41 washed of dust and sieved to a 180–250  $\mu\text{m}$  grain size (after Ozawa et al., 2006).

42 Following purification of whole rock groundmass material by magnetic separation,  
43 approximately 300 mg of groundmass material was hand-picked under a binocular micro-  
44 scope. Grains were treated with 5%  $\text{HNO}_3$  for 10 min in an ultrasonic bath, followed by  
45 2% HF for 1 min, followed by deionised water for 10 min. The sample was then loaded  
46 into an aluminium foil packet, placed in a quartz tube (UM#54), and bracketed by packets  
47 containing the flux monitor standard Alder Creek Rhyolite (ACR) sanidine. Can UM#54  
48 was irradiated for 30 min in the Cadmium-Lined In-Core Irradiation Tube (CLICIT)  
49 facility of the Oregon State University TRIGA reactor, USA.

50 Individual aliquots measuring approximately 100 mg were loaded as double- to triple-grain  
51 layers into a custom-made circular copper sample holder containing four parallel slots,  
52 measuring 6 mm wide, 25–30 mm long and 3 mm deep. The holder was covered with a  
53 ZnS glass disc and loaded into the sample chamber of a gas-handling system connected to  
54 a multi-collector Thermofisher ARGUSVI mass spectrometer in the Ar-Ar Laboratory,  
55 University of Melbourne. As described in detail by Phillips and Matchan (2013), the  
56 ARGUSVI detector array comprises 5 Faraday detectors and a CDD (compact discrete  
57 dynode) electron multiplier, allowing simultaneous collection of all 5 argon isotopes ( $^{36}\text{Ar}$   
58 was measured on the CDD).

59 The extraction line and contained samples were baked for at least 12 hours at  $\sim 120^\circ\text{C}$ .  
60 Once acceptable (UHV) background levels were achieved, each aliquot was heated with a  
61 Photon Machines Fusions 10.6  $\text{CO}_2$  laser to remove the majority of loosely-bound argon;  
62 this was achieved using the 6 mm homogenised beam focused to a narrow intense energy  
63 band perpendicular to the sample slot, operated step-wise between 1 and 2% laser power.  
64 For step-heating experiments, aliquots were heated incrementally over a range of 4–14%  
65 laser power (0.95–2.90 W). Line blanks were measured after every second or third sample  
66 analysis and were typically  $<1\text{--}3$  fA for  $^{40}\text{Ar}$ , compared to  $\geq 150$  fA for typical sample  
67 analyses (see Table DR1). Mass discrimination and detector bias were characterised via

68 automated analyses of air pipette aliquots prior to the first analysis, assuming an  
69 atmospheric  $^{40}\text{Ar}/^{36}\text{Ar}$  ratio of  $298.56 \pm 0.31$  (Lee et al., 2006).

70 Due to the short irradiation time it was not feasible to include Ca/K/Cl salts/glasses in the  
71 same package. Therefore, correction factors determined for K-glass and Ca-salts contained  
72 in another recent package irradiated in the CLICIT facility (UM#52) were used:  
73  $(^{39}\text{Ar}/^{37}\text{Ar})_{\text{Ca}} = (6.5075 \pm 0.0033) \times 10^{-4}$ ;  $(^{36}\text{Ar}/^{37}\text{Ar})_{\text{Ca}} = (2.7703 \pm 0.0017) \times 10^{-4}$ ;  
74  $(^{40}\text{Ar}/^{39}\text{Ar})_{\text{K}} = (5.88 \pm 0.18) \times 10^{-4}$ ; and  $(^{38}\text{Ar}/^{39}\text{Ar})_{\text{K}} = (1.20540 \pm 0.00072) \times 10^{-2}$ . The J-  
75 value for sample NVP18 ( $0.000131244 \pm 0.000000084$ ; 0.06%  $1\sigma$ ) was calculated by  
76 averaging the mean  $^{40}\text{Ar}^*/^{39}\text{Ar}$  ratios from fusion analyses conducted on several aliquots  
77 (three grains per aliquot) of bracketing ACR sanidine standards.

78

## 79 **VIC25**

80 Sample preparation and analytical procedures followed those described in Oostingh et al.  
81 (2017). Approximately 1 kg of sample was crushed in a hydraulic press to cm-scale chips,  
82 and the freshest chips were further crushed in a Tungsten-Carbide ring mill. Crushed  
83 material was then sieved to a 355–500  $\mu\text{m}$  grain size and washed of dust. Approximately  
84 300 mg of groundmass was hand-picked using a binocular stereomicroscope. Grains were  
85 treated with methanol and diluted HF (2N) for 5 min to remove any glass, followed by  
86 duplicate washes with deionised water. The sample was then loaded into an aluminium  
87 disc wrapped in aluminium foil and stacked into a quartz tube along with other sample  
88 discs and the flux monitor Fish Canyon Tuff sanidine for which an age of  $28.126 \pm 0.019$   
89 Ma (Phillips et al., 2017) was assumed. The vial was irradiated for 20 min in the CLICIT  
90 facility of the Oregon State University TRIGA reactor.

91  $^{40}\text{Ar}/^{39}\text{Ar}$  step-heating analyses were performed using the multi-collector Thermofisher  
92 ARGUSVI mass spectrometer at the West Australian Argon Isotope Facility, Curtin  
93 University, Perth. Two aliquots of irradiated sample, each weighing approximately 100  
94 mg, were placed as a single layer in a custom-made high-grade aluminium sample disk,  
95 and loaded into the sample chamber connected to a custom-built, extra low volume (240  
96  $\text{cm}^3$ ), stainless steel gas extraction line. The sample and extraction line were baked at 1200  
97 C for approximately 12 h. Each aliquot was step-heated with a 100 W Photon Machines  
98 Fusions 10.6 CO<sub>2</sub> laser using a homogenized 4 mm beam operated between 3 and 40%  
99 laser power (maximum power of 55 W), whereas standards were fused in a single step.  
100 During each heating step, the beam was continually jogged over the sample for

approximately 1 min. The resulting gas was purified using a polycold electrical cryocooler, a liquid nitrogen condensation trap, a SAES GP50 getter operating at 4508C, a AP10 SAES getter operating at 4508C and a AP10 SAES getter operating at room temperature. As for NVP18, measurement was performed in multicollector mode with  $^{37}\text{Ar}$ ,  $^{38}\text{Ar}$ ,  $^{39}\text{Ar}$ , and  $^{40}\text{Ar}$  analysed on four Faraday detectors ( $10^{12} \Omega$  resistors on mass 40, 38, and 37 and  $10^{13} \Omega$  on mass 39) and  $^{36}\text{Ar}$  analysed on the CDD.

Argon isotope results are corrected for system blanks, mass discrimination, radioactive decay and reactor-induced interference reactions. System blanks were measured every fourth sample experiment. Mass discrimination was closely monitored via an automated air pipette system before and after each step-heating experiment assuming the Lee et al. (2006) atmospheric  $^{40}\text{Ar}/^{36}\text{Ar}$  ratio. The J-value for all specific levels in the irradiation vial was calculated by averaging the mean ( $^{40}\text{Ar}^*/^{39}\text{Ar}$ ) ratios from total fusion analysis of four single-grain aliquots of FC sanidine bracketing the sample. The J-value for VIC25 was  $0.00009793 \pm 0.00000031$  (0.32%). The following correction factors obtained via prolonged irradiation of K-Ca-Cl glass/salts in the CLICIT facility of the Oregon State TRIGA reactor were applied to the data:  $(^{39}\text{Ar}/^{37}\text{Ar})_{\text{Ca}} = (7.60 \pm 0.09) \times 10^{-4}$ ;  $(^{36}\text{Ar}/^{37}\text{Ar})_{\text{Ca}} = (2.70 \pm 0.02) \times 10^{-4}$ ;  $(^{40}\text{Ar}/^{39}\text{Ar})_{\text{K}} = (7.30 \pm 0.90) \times 10^{-4}$ ; and  $(^{38}\text{Ar}/^{39}\text{Ar})_{\text{K}} = (1.24 \pm 0.004) \times 10^{-2}$  (Jourdan and Renne, 2007).

## Age Calculations

$^{40}\text{Ar}/^{39}\text{Ar}$  ages for NVP18 and VIC25 were calculated relative to an age of 1.18144 Ma  $\pm$  0.00068 Ma ( $2\sigma$ ) for ACR sanidine (Phillips et al. 2017), and 28.126 Ma + 0.019 Ma for FCT sanidine (Phillips et al. 2017), respectively, using the decay constants of Steiger and Jäger (1977). Calculated uncertainties associated with plateau and inverse isochron ages include uncertainties in the J-value, but exclude errors associated with the age of the flux monitor and the decay constant. Unless otherwise stated, uncertainties are reported at the  $2\sigma$  level (see Ludwig, 2012). Plateau ages are defined as including  $\geq 50\%$  of the total  $^{39}\text{Ar}$ , from at least 3 contiguous steps, with  $^{40}\text{Ar}^*/^{39}\text{Ar}$  ratios within error of the mean at the 95% confidence level. Argon isotopic results for NVP18 and VIC25 are reported Tables DR1 and DR2, respectively. Step-heating spectra and isochron plots (Figs. 3, DR2, and DR3) were generated using ISOPLOT/Ex v.3.75 (Ludwig, 2012) and ArArCALC (Koppers, 2002) for NVP18 and VIC25, respectively. A summary of inverse isochron results for each aliquot, plateau age results and total gas ages, is provided in Table DR3.

133 For both samples alike, composite inverse isochrons were generated by pooling concordant  
134 data from all aliquots, selecting data from consecutive heating steps only. Anomalous  
135 intermediate steps V18-2c and VIC25-B-5M7646 were excluded from the composite  
136 inverse isochron calculations of NVP18 and VIC25, respectively. NVP18 yielded a  
137 composite inverse isochron age of  $36.9 \pm 3.1$  ka (95% CI; MSWD = 1.7,  $p = 0.02$ ,  $n = 24$ )  
138 and a corresponding initial argon value ( $(^{40}\text{Ar}/^{36}\text{Ar})_i$ ) of  $297.9 \pm 1.5$  (95% CI), with the  
139 isochron data representing 85% of the total  $^{39}\text{Ar}$  released across the four aliquots VIC25  
140 yielded a composite inverse isochron age of  $36.8 \pm 3.8$  ka ( $2\sigma$ ; MSWD = 1.04,  $p = 0.41$ ,  $n$   
141 = 22) and a corresponding ( $^{40}\text{Ar}/^{36}\text{Ar})_i$  value of  $301 \pm 1.8$  ( $2\sigma$ ), with the included steps  
142 representing 77% of the total  $^{39}\text{Ar}$  released across the two aliquots (Fig DR3c).

Tables DR1–DR3. Ar-Ar analytical data set and age results summary

20201111\_Tables DR1-DR3.xlsx



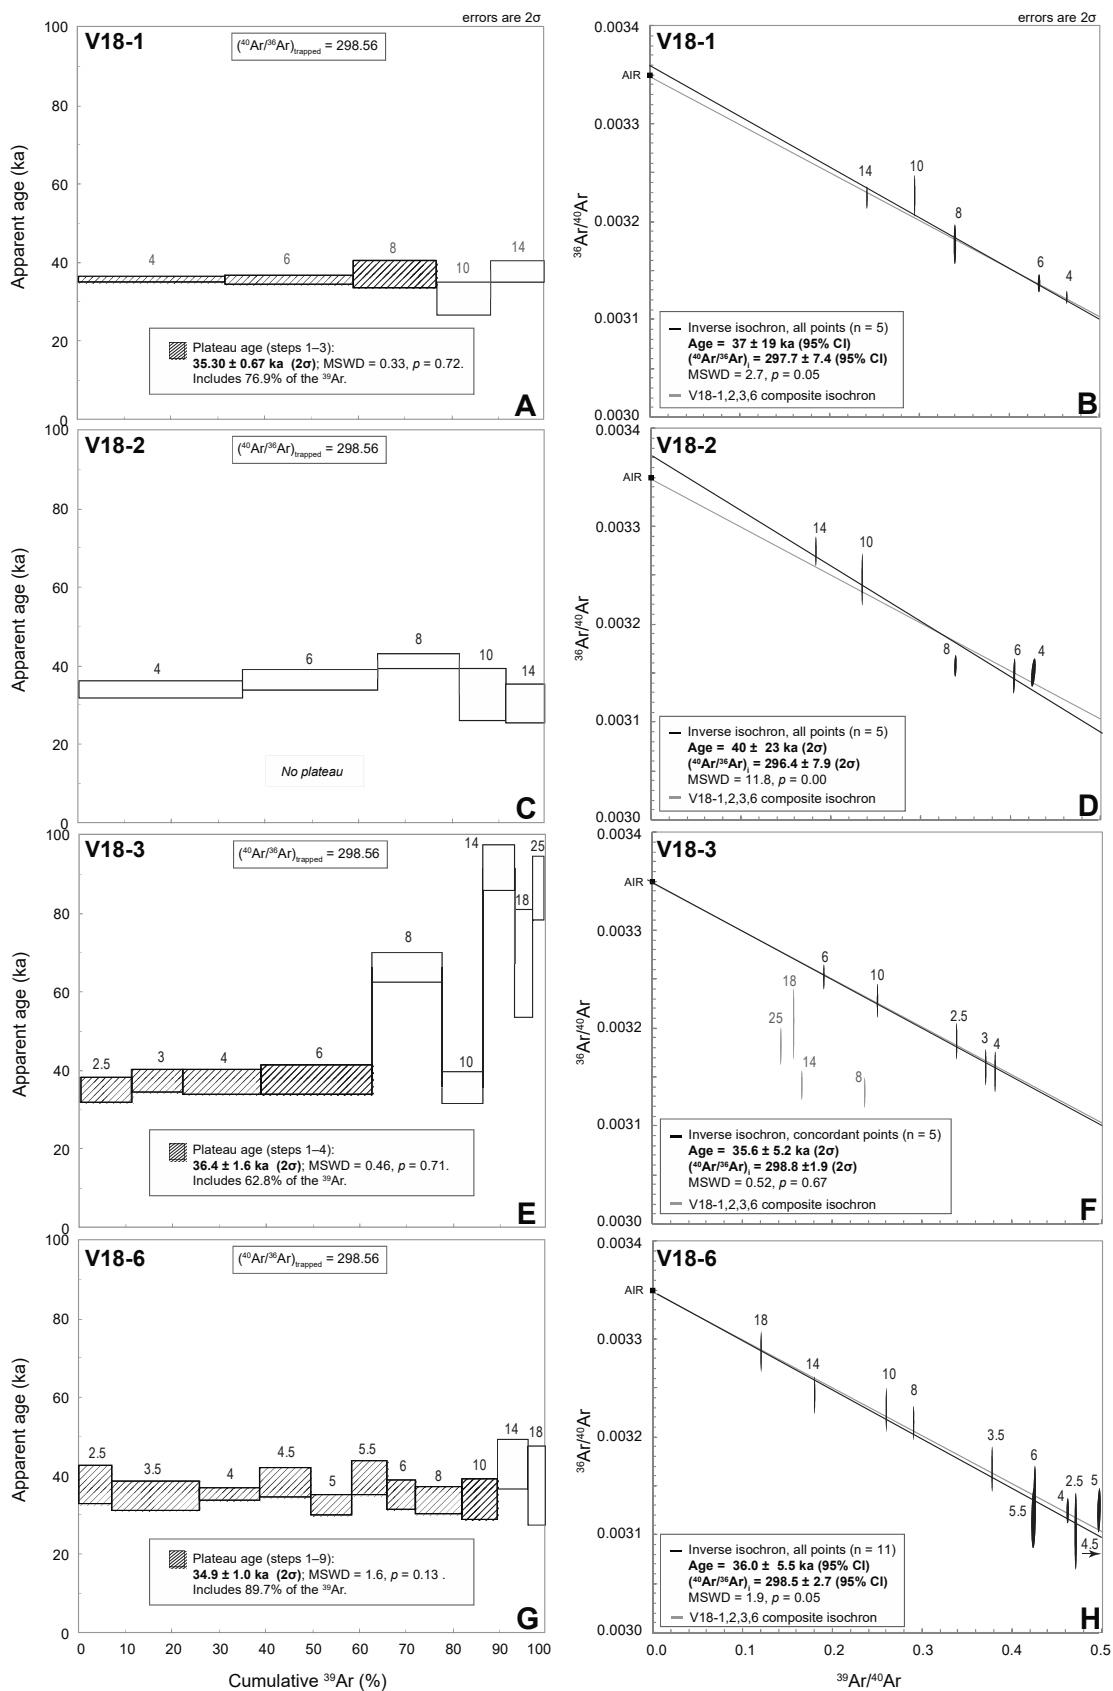

143

144 **Figure DR2.** A–G. Individual  $^{40}\text{Ar}/^{39}\text{Ar}$  ‘model’ age spectra ( $(^{40}\text{Ar}/^{36}\text{Ar})_{\text{trapped}} = 298.56$ ) and inverse isochron  
145 diagrams for individual aliquots of basalt groundmass sample NVP18 (Tyrendarra flow). Data are annotated

146 with laser power (%). Data excluded from inverse isochrons are in grey. **I.** Composite inverse isochron for  
 147 concordant points from all aliquots. Data outlined in black are included in the composite inverse isochron.

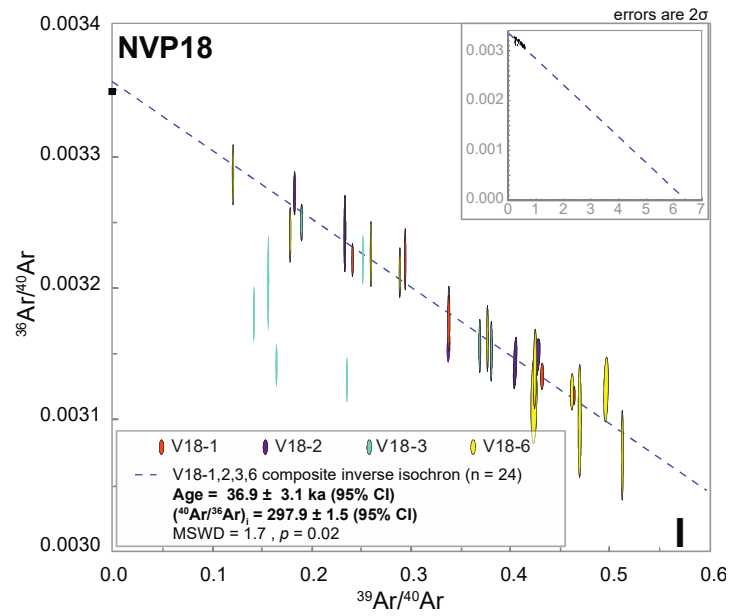

148  
 149 **Figure DR2 cont.**  
 150



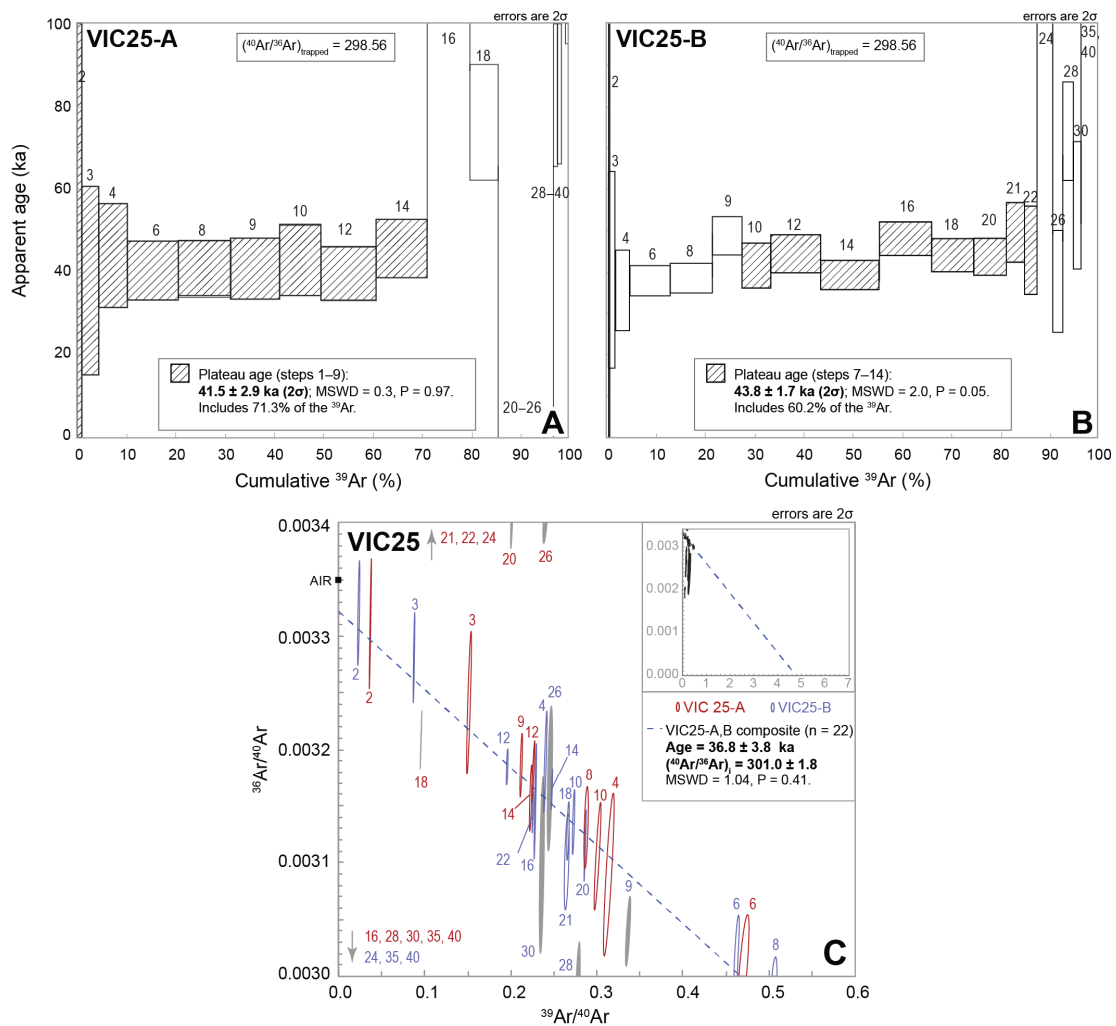

**Figure DR3. A–B.** Individual  $^{40}\text{Ar}/^{39}\text{Ar}$  ‘model’ age spectra ( $(^{40}\text{Ar}/^{39}\text{Ar})_{\text{trapped}} = 298.56$ ) for aliquots of basalt groundmass sample VIC25 (Tower Hill lava bomb groundmass). Data are annotated with laser power (%). **C.** Composite inverse isochron diagram for VIC25-A and VIC25-B. Data are annotated with laser power (%).

156   **REFERENCES**

- 157   Jourdan, F., Renne, P., 2007. Age calibration of the Fish Canyon sanidine  $^{40}\text{Ar}/^{39}\text{Ar}$  dating  
158       standard using primary K-Ar standards. *Geochimica et Cosmochimica Acta*, v. 71, p.  
159       387–402.
- 160   Koppers, A.A.P., 2002. ArArCALC-software for  $^{40}\text{Ar}/^{39}\text{Ar}$  age calculations. *Computers &*  
161       *Geosciences*, v. 28, p. 605–619.
- 162   Lee, J.-Y., Marti, K., Severinghaus, J. P., Kawamura, K., Yoo, H.-S., Lee, J. B., and Kim,  
163       J. S., 2006, A redetermination of the isotopic abundances of atmospheric Ar:  
164       *Geochimica et Cosmochimica Acta*, v. 70, p. 4507-4512.
- 165   Ludwig, K. R., 2012, User's Manual for Isoplot 3.75. A Geochronological Toolkit for  
166       Microsoft Excel: Spec. Publ. No. 5, Berkeley Geochronology Center, Berkeley,  
167       California, p. 75 pp.
- 168   Matchan, E. L., and Phillips, D., 2014, High precision multi-collector  $^{40}\text{Ar}/^{39}\text{Ar}$  dating of  
169       young basalts: Mount Rouse volcano (SE Australia) revisited: *Quaternary*  
170       *Geochronology*, v. 22, p. 57-64.
- 171   Oostingh, K.F., Jourdan, F., Matchan, E.L., and Phillips, D., 2017.  $^{40}\text{Ar}/^{39}\text{Ar}$   
172       geochronology reveals rapid change from plume-assisted to stress-dependent  
173       volcanism in the Newer Volcanic Province, SE Australia. *Geochemistry, Geophysics,*  
174       *Geosystems*, doi:10.1002/2016GC006601.
- 175   Ozawa, A., Tagami, T., and Kamata, H., 2006, Argon isotopic composition of some  
176       Hawaiian historical lavas: *Chemical Geology*, v. 226, no. 1-2, p. 66-72.
- 177   Phillips, D., and Matchan, E. L., 2013, Ultra-high precision  $^{40}\text{Ar}/^{39}\text{Ar}$  ages for Fish Canyon  
178       Tuff and Alder Creek Rhyolite sanidine: new dating standards required?: *Geochimica et*  
179       *Cosmochimica Acta*, v. 121, p. 229-239.
- 180   Phillips, D., Matchan, E.L., Honda, M., and Kuiper, K.F., 2017. Astronomical calibration  
181       of  $^{40}\text{Ar}/^{39}\text{Ar}$  reference minerals using high-precision, multi-collector (ARGUSVI)  
182       mass spectrometry. *Geochimica et Cosmochimica Acta*, v. 196, p. 351–369.

183 Steiger, R. H., and Jäger, E., 1977, Subcommittee on geochronology: Convention on the  
184 use of decay constants in geo- and cosmochemistry: Earth and Planetary Science  
185 Letters, v. 36, p. 359-362.
